# Supplementary material for: Surface Water Processes Influencing Alterations in Pharmaceutical Chemical Composition following Wastewater Discharge into a Freshwater Estuary
Source: MDPI journal article supplement (doi:10.3390/toxics10110702), 2022-11-17
Supplement: s1 [file s1]

# Supplementary Materials: Surface Water Processes Influencing Alterations in Pharmaceutical Chemical Composition Following Wastewater Discharge into a Freshwater Estuary

Gregory Foster, Arion Leahigh and Thomas Huff

**Table S1.** Details of sampling locations in the tidal freshwater Potomac River.

| Site Name           | No. of Sites | Location       | Site No. <sup>a</sup> | DD Coordinates      | Sampling in 2018      |
|---------------------|--------------|----------------|-----------------------|---------------------|-----------------------|
| Chain Bridge        | 1            | Arlington, VA  | 1                     | 38.9296, -77.11682  | June, July, Sept      |
| Upper Four Mile Run | 1            | Arlington, VA  | 2                     | 38.84884, -77.10265 | May, June, July, Sept |
| Four Mile Run       | 2            | Arlington, VA  | 3,4                   | 38.8405, -77.05262  | May, June, July, Sept |
| Upper Hunting Creek | 1            | Alexandria, VA | 5                     | 38.83284, -77.04018 | May, June, July, Sept |
|                     |              |                |                       | 38.80543, -77.10747 | May, June, July, Sept |
|                     |              |                |                       | 38.79367, -77.05887 |                       |
|                     |              |                |                       | 38.78546, -77.05128 |                       |
| Hunting Creek       | 5            | Alexandria, VA | 6-10                  | 38.77958, -77.04911 | May, June, July, Sept |
|                     |              |                |                       | 38.77815, -77.0345  |                       |
|                     |              |                |                       | 38.79839, -77.03847 |                       |
| Upper Gunston Cove  | 1            | Lorton, VA     | 11                    | 38.70129, -77.21021 | May, June, July, Sept |
| Gunston Cove        | 2            | Lorton, VA     | 12,13                 | 38.67514, -77.15645 | May, June, July, Sept |
|                     |              |                |                       | 38.67399, -77.12894 |                       |
| Lower Potomac       | 1            | Woodbridge, VA | 14                    | 38.5911, -77.24595  | June, July, Sept      |

<sup>a</sup>Site number according to Figure 1 in text.

**Table S2.** Pertinent Information on major wastewater treatment plants in the tidal freshwater Potomac River that were relevant to this study.

| WTP Name | Tributary of Discharge | Discharge Capacity<br>(cubic meters per day) | Sewershed Population |
|----------|------------------------|----------------------------------------------|----------------------|
| WTP 1    | Four Mile Run          | 175,000                                      | ~300,000             |
| WTP 2    | Hunting Creek          | 110,000                                      | ~315,000             |
| WTP 3    | Gunston Cove           | 300,000                                      | ~372,000             |
| WTP 4    | Neabsco Creek          | 109,000                                      | ~140,000             |

**Table S3.** LC-MS/MS Instrument Parameters.

| Parameter                      | Operating Conditions  |
|--------------------------------|-----------------------|
| <u>UHPLC Parameters</u>        |                       |
| UHPLC Flow Rate                | 0.40 mL/min           |
| UHPLC Column Temp              | 40°C                  |
|                                | 10% B at 0 min        |
|                                | 50% to 95% B 0-6 min  |
|                                | 100% B 6-7 min        |
| UHPLC Gradient Elution Program | 100% to 30% B 7-9 min |
|                                | 10% B 9-10 min        |
|                                | 10.01 min Off         |
| <u>MS Parameters</u>           |                       |
| Nebulizing Gas Flow            | 2 L/min               |
| Heating Gas Flow               | 10 L/min              |
| Drying Gas Flow                | 10 L/min              |
| Interface Temperature          | 300°C                 |

**Table S4.** LC-MS/MS parameters of PPCPs subjected chemical analysis in this study.

| Chemical                 | Type                | MRM <sup>a</sup> | RT <sup>b</sup> (min) | LOQ <sup>c</sup><br>Water<br>(ng/L) | LOQ<br>Sediment<br>(ng/g dw) |
|--------------------------|---------------------|------------------|-----------------------|-------------------------------------|------------------------------|
| Caffeine 13C3 IS         | ISTD <sup>a</sup>   | 198.10>140.20    | 2.288                 |                                     |                              |
| Diazepam D5 IS           | ISTD                | 290.10>198.20    | 6.361                 |                                     |                              |
| Sulfomethazine 13C6      | ISTD                | 285.10>186.10    | 3.103                 |                                     |                              |
| Hydrocodone D6 SS        | SSTD                | 306.20>202.15    | 2.477                 |                                     |                              |
| Desethylatrazine 13C3 SS | SSTD                | 191.10>149.20    | 2.888                 |                                     |                              |
| Sulfomethoxazole 13C6    | SSTD <sup>b</sup>   | 260.10>162.10    | 3.789                 |                                     |                              |
| Ethyl Paraben 13C6 SS    | SSTD                | 173.20>101.20    | 4.359                 |                                     |                              |
| Norsertaline 13C6        | SSTD                | 281.00>159.05    | 5.675                 |                                     |                              |
| Alprazolam D5            | SSTD                | 314.10>286.15    | 5.793                 |                                     |                              |
| Benzophenone D10 SS      | SSTD                | 193.20>110.20    | 6.836                 |                                     |                              |
| Nicotine                 | Target <sup>c</sup> | 163.30>130.30    | 0.454                 | 1.9                                 | 2.1                          |
| trans-3'-Hydroxycotinine | Target              | 193.30>80.25     | 0.449                 | 7.2                                 | 5.1                          |
| Acyclovir                | Target              | 226.30>152.30    | 0.454                 | 21                                  | 12                           |
| Cimetidine               | Target              | 253.30>95.15     | 1.127                 | 12                                  | 6.2                          |
| Cotinine                 | Target              | 177.30>80.20     | 0.458                 | 6.8                                 | 3.0                          |
| Albuterol                | Target              | 240.40>148.20    | 0.923                 | 2.2                                 | 1.5                          |
| Atenolol                 | Target              | 267.30>145.25    | 1.024                 | 5.7                                 | 2.9                          |
| Ranitidine               | Target              | 315.30>176.25    | 0.463                 | 8.9                                 | 7.3                          |
| Azithromycin             | Target              | 591.50>116.10    | 2.146                 | 3.5                                 | 1.7                          |
| Gabapentin               | Target              | 172.40>154.30    | 1.506                 | 11                                  | 4.5                          |
| Morphine                 | Target              | 286.40>152.20    | 0.933                 | 19                                  | 9.4                          |
| Oxymorphone              | Target              | 302.30>284.15    | 1.073                 | 11                                  | 7.6                          |
| Clonidine                | Target              | 230.20>44.20     | 1.784                 | 12                                  | 6.2                          |
| 2-Hydroxy Ibuprofen      | Target              | 221.30>180.25    | 1.926                 | 24                                  | 11                           |
| Hydromorphone            | Target              | 286.30>185.20    | 1.000                 | 16                                  | 6.7                          |
| Nadolol                  | Target              | 310.40>254.35    | 2.141                 | 5.0                                 | 4.9                          |
| Caffeine                 | Target              | 195.30>138.25    | 2.284                 | 15                                  | 7.9                          |
| Sulfathiazole            | Target              | 256.20>92.10     | 2.457                 | 6.5                                 | 4.7                          |
| Aspartame                | Target              | 295.30>120.35    | 2.392                 | 10                                  | 5.1                          |
| Penicillin G             | Target              | 335.30>289.15    | 2.384                 | 33                                  | 14                           |
| Amphetamine              | Target              | 136.10>65.15     | 1.731                 | 2.9                                 | 1.3                          |
| Methamphetamine          | Target              | 150.00>91.20     | 2.001                 | 3.1                                 | 2.7                          |
| Triamterene              | Target              | 254.30>237.20    | 2.605                 | 1.8                                 | 0.92                         |
| Naloxone                 | Target              | 328.40>310.20    | 1.888                 | 1.4                                 | 6.1                          |
| MDA <sup>d</sup>         | Target              | 180.40>163.25    | 1.939                 | 4.9                                 | 5.5                          |
| Codeine                  | Target              | 300.30>165.30    | 2.005                 | 4.1                                 | 2.6                          |
| Ciprofloxacin            | Target              | 332.30>314.20    | 2.903                 | 26                                  | 17                           |
| Phentermine              | Target              | 150.00>91.20     | 1.983                 | 8.9                                 | 3.8                          |
| Metoprolol               | Target              | 268.40>116.20    | 2.949                 | 6.4                                 | 3.2                          |
| Sulfamethazine           | Target              | 279.30>186.20    | 3.107                 | 6.2                                 | 3.7                          |
| Naltrexone               | Target              | 342.40>324.20    | 2.311                 | 1.4                                 | 2.7                          |
| MDMA <sup>e</sup>        | Target              | 194.40>163.35    | 2.319                 | 6.1                                 | 12                           |
| Enrofloxacin             | Target              | 360.30>316.40    | 3.219                 | 22                                  | 14                           |
| Formoterol               | Target              | 345.40>149.30    | 3.301                 | 34                                  | 12                           |
| Atrazine Mercapturate    | Target              | 343.30>214.25    | 3.324                 | 8.0                                 | 6.9                          |
| Hydrocodone              | Target              | 300.30>199.20    | 2.486                 | 12                                  | 6.7                          |
| cis-Tramadol             | Target              | 264.40>58.20     | 3.132                 | 5.2                                 | 2.6                          |
| Desvenlafaxine           | Target              | 264.40>58.20     | 2.656                 | 2.0                                 | 1.0                          |
| Bupropion                | Target              | 240.30>184.20    | 3.646                 | 2.8                                 | 1.4                          |
| Sulfamethoxazole         | Target              | 254.30>92.10     | 3.781                 | 8.3                                 | 4.2                          |
| Enalapril                | Target              | 377.40>234.20    | 4.235                 | 9.9                                 | 7.1                          |
| Propranolol              | Target              | 260.30>116.20    | 4.316                 | 2.4                                 | 1.1                          |
| Meperidine               | Target              | 248.40>174.20    | 3.536                 | 8.4                                 | 5.9                          |

|                             |        |               |       |      |      |
|-----------------------------|--------|---------------|-------|------|------|
| Sulfadimethoxine            | Target | 311.30>156.25 | 4.518 | 5.9  | 4.8  |
| Dextromethorphan            | Target | 272.40>215.25 | 4.549 | 0.91 | 0.46 |
| Sulfaquinolaxine            | Target | 301.20>92.10  | 4.638 | 4.2  | 3.1  |
| Venlafaxine                 | Target | 278.40>58.25  | 3.812 | 0.94 | 0.47 |
| Diphenhydramine             | Target | 256.30>167.20 | 4.701 | 3.5  | 1.8  |
| Diltiazem                   | Target | 415.30>178.20 | 5.137 | 0.52 | 0.26 |
| 10,11-Carbamazepine Epoxide | Target | 253.30>180.30 | 4.293 | 13   | 6.4  |
| Promethazine                | Target | 285.30>86.20  | 5.169 | 1.7  | 0.96 |
| Propoxyphene                | Target | 340.40>58.20  | 5.512 | 7.5  | 3.8  |
| Fentanyl                    | Target | 337.40>188.40 | 5.25  | 2.1  | 1.0  |
| Verapamil                   | Target | 455.40>165.30 | 5.679 | 10   | 5.1  |
| Escitalopram                | Target | 325.40>109.10 | 4.806 | 51   | 26   |
| Benzotropine                | Target | 308.40>167.35 | 5.758 | 4.1  | 0.45 |
| Buprenorphine               | Target | 468.50>396.30 | 5.800 | 4.8  | 4.6  |
| Fexofenadine                | Target | 502.40>466.40 | 5.773 | 4.5  | 2.3  |
| Carbamazepine               | Target | 237.30>194.25 | 5.059 | 5.8  | 2.9  |
| Loratadine                  | Target | 383.30>337.15 | 6.019 | 9.7  | 3.5  |
| Naproxen                    | Target | 185.30>170.20 | 6.101 | 27   | 14   |
| Oxazepam                    | Target | 287.20>241.10 | 5.295 | 0.75 | 0.39 |
| Paroxetine                  | Target | 330.30>192.40 | 5.289 | 3.6  | 0.96 |
| Fluoxetine                  | Target | 310.20>44.25  | 5.502 | 2.0  | 1.0  |
| Nordiazepam                 | Target | 271.20>140.25 | 5.365 | 13   | 5.2  |
| Bezafibrate                 | Target | 362.30>139.20 | 6.229 | 2.1  | 0.88 |
| Nitrazepam                  | Target | 282.30>236.20 | 5.332 | 2.4  | 0.45 |
| Lorazepam                   | Target | 321.30>275.05 | 5.427 | 15   | 7.3  |
| Budesonide                  | Target | 431.40>413.30 | 6.392 | 26   | 9.4  |
| Nortriptyline               | Target | 264.30>233.25 | 5.514 | 1.7  | 0.88 |
| Amitriptyline               | Target | 278.40>233.30 | 5.662 | 2.7  | 1.5  |
| Methadone                   | Target | 310.40>265.25 | 5.818 | 0.54 | 0.27 |
| Clonazepam                  | Target | 316.30>270.10 | 6.200 | 3.3  | 7.4  |
| Alprazolam                  | Target | 309.30>281.15 | 5.815 | 0.61 | 0.50 |
| Sertraline                  | Target | 306.20>159.10 | 5.885 | 21   | 11   |
| Temazepam                   | Target | 301.20>255.20 | 6.070 | 6.0  | 3.0  |
| Diazepam                    | Target | 285.30>193.25 | 6.417 | 1.8  | 0.81 |
| Atorvastatin                | Target | 559.30>250.00 | 7.194 | 0.95 | 0.48 |
| Triclocarban                | Target | 315.20>127.10 | 7.374 | 0.55 | 0.38 |
| Lisinopril                  | Target | 406.40>84.25  | 7.474 | 1.5  | 2.4  |
| Tetracycline                | Target | 445.20>341.10 | 7.789 | 39   | 56   |
| Hydrochlorothiazide         | Target | 296.20>205.20 | 2.171 | 4.8  | 1.9  |
| Furosemide                  | Target | 329.00>285.25 | 5.141 | 3.9  | 4.5  |
| Glipizide                   | Target | 444.20>319.25 | 5.974 | 9.7  | 3.0  |
| Warfarin                    | Target | 307.10>161.25 | 6.644 | 1.1  | 0.54 |
| Diclofenac                  | Target | 293.90>250.05 | 7.139 | 29   | 15   |
| Celecoxib                   | Target | 380.10>316.30 | 7.222 | 2.2  | 1.0  |

<sup>a</sup>MRM, multiple reaction monitoring ions.

ITSD is internal injection standard.

<sup>b</sup>SSTD is surrogate standard.

<sup>c</sup>Target is unknown chemical.

MRM indicates precursor ion>1<sup>o</sup> MRM ion.

RT is UHPLC retention time in minutes.

<sup>d</sup>3,4-Methylenedioxyamphetamine.

<sup>e</sup>3,4-Methylenedioxy-N-ethylamphetamine.

**Table S5.** Flow data for upstream locations on the day of each sampling event.

| Sampling Location          | Sampling Trip | Daily Average Flow (m <sup>3</sup> /s) | Longterm Historical Average Flow (m <sup>3</sup> /s) | Days since previous storm event |
|----------------------------|---------------|----------------------------------------|------------------------------------------------------|---------------------------------|
| Potomac River-Little Falls | May           | 129                                    | 328<br>(89 years of record)                          | 0                               |
|                            | June          | 1097                                   |                                                      | 3                               |
|                            | July          | 372                                    |                                                      | 13                              |
| Cameron Run                | May           | 0.212                                  | 1.16<br>(56 years of record)                         | 5                               |
|                            | June          | 0.416                                  |                                                      | 4                               |
|                            | July          | 0.151                                  |                                                      | 18                              |
|                            | Sept          | 0.852                                  |                                                      | 4                               |
| Accotink Cr                | May           | 0.263                                  | 0.75<br>(71 years of record)                         | 12                              |
|                            | June          | 0.759                                  |                                                      | 2                               |
|                            | July          | 0.430                                  |                                                      | 11                              |
|                            | Sept          | 0.145                                  |                                                      | 3                               |
| Four Mile Run              | May           | 1.79                                   | 0.88<br>(44 years of record)                         | 9                               |
|                            | June          | 0.96                                   |                                                      | 5                               |
|                            | July          | 1.80                                   |                                                      | 11                              |
|                            | Sept          | 0.81                                   |                                                      | 3                               |

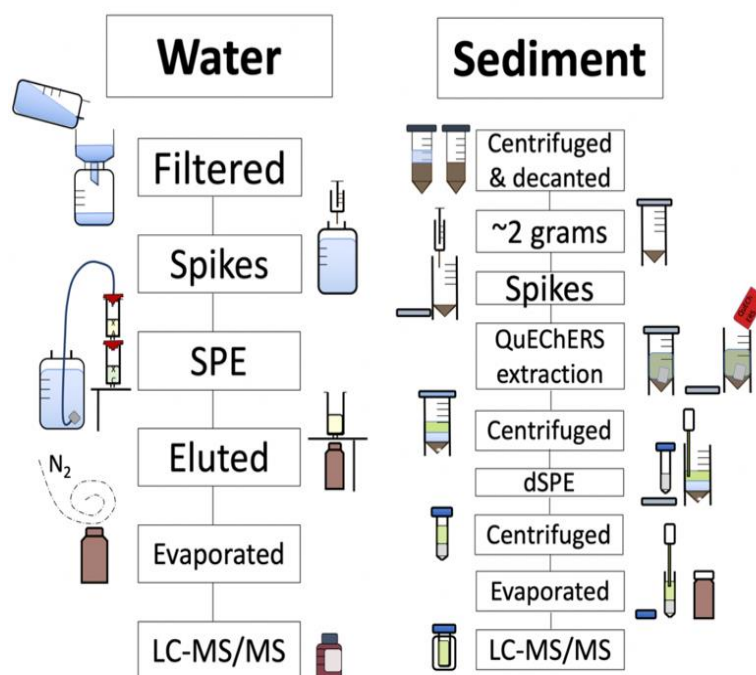

**Scheme S1.** Water and sediment processing flow chart (courtesy of Lisa McAnulty, George Mason University, Potomac Science Center).

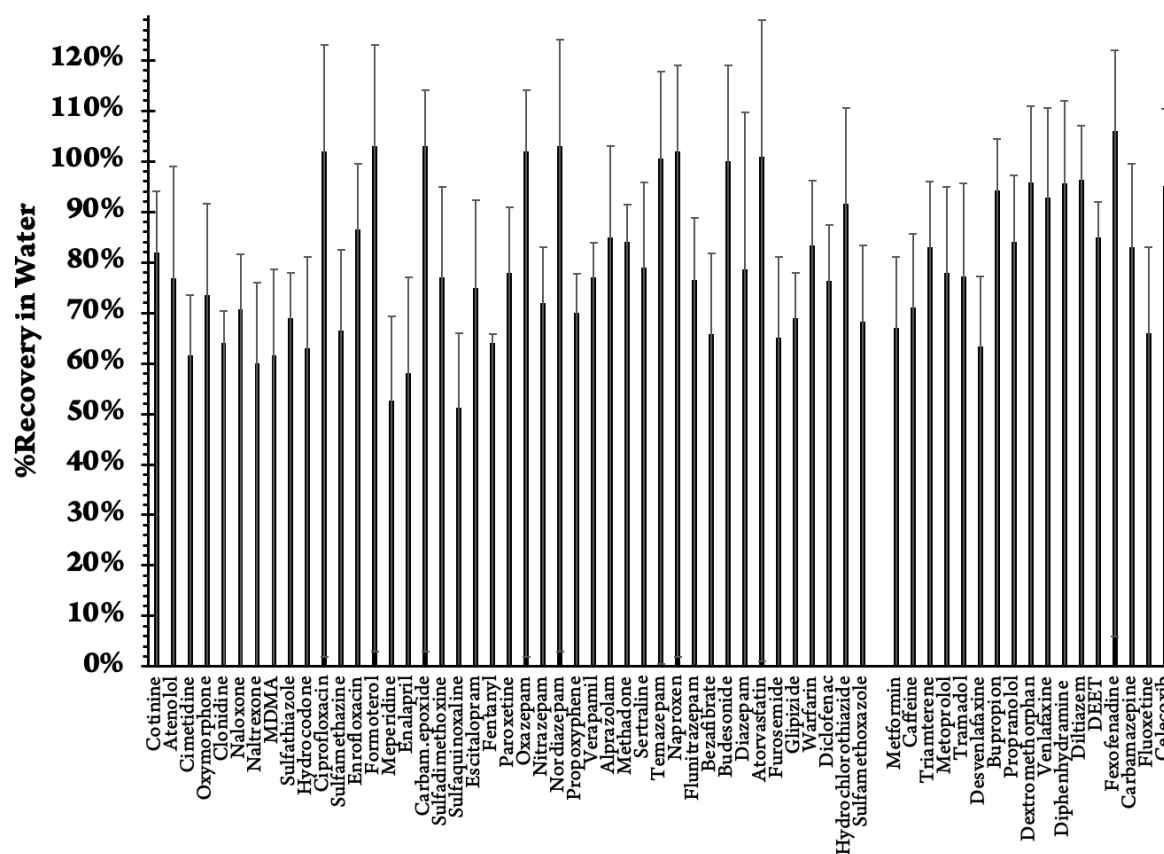

Figure S1. Full target matrix spike (at 25 ng/L) recoveries in surface water ( $N = 7$ ).

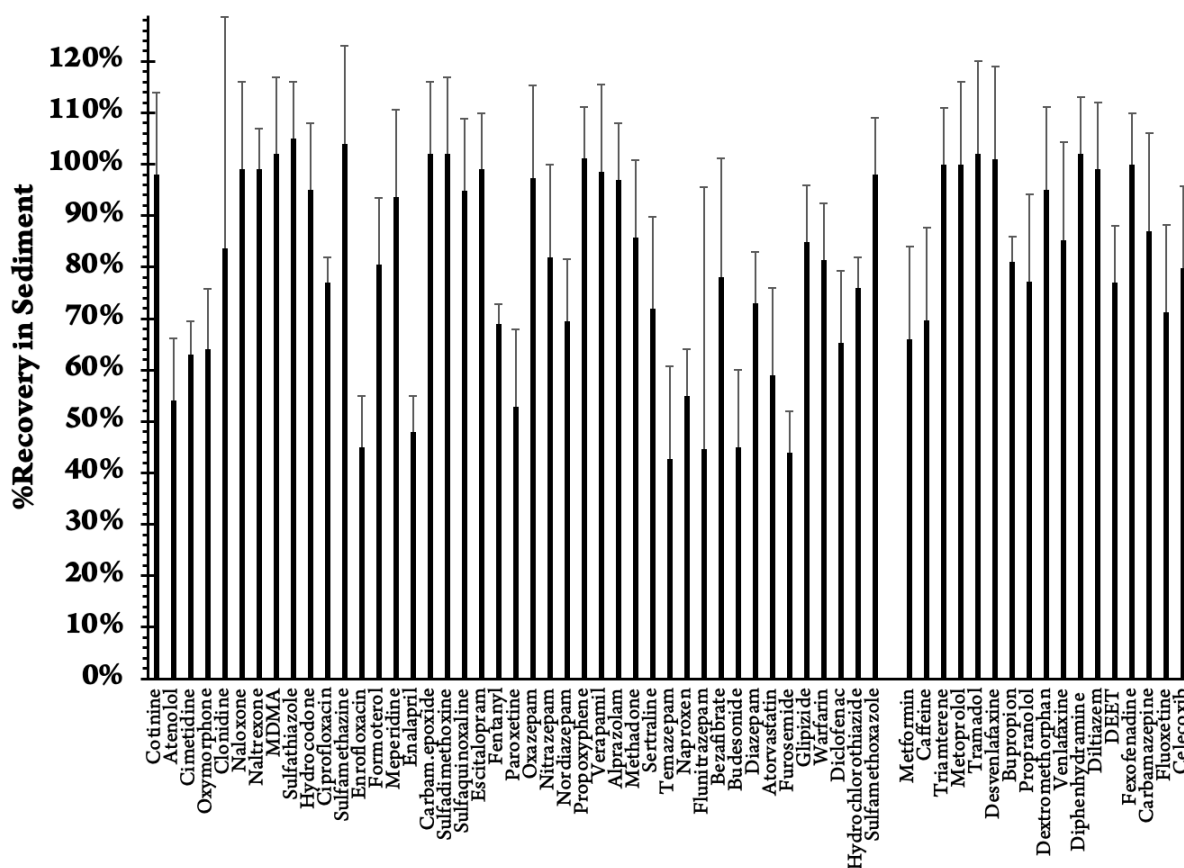

Figure S2. Full target matrix spike (at 20 ng/g) recoveries in sediment using QuEChERS ( $N = 7$ ).

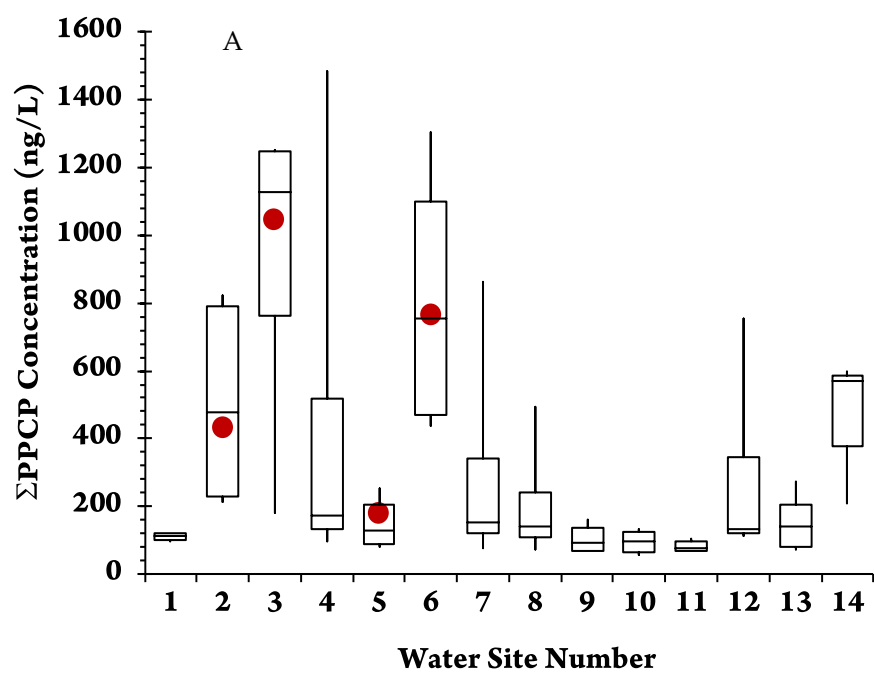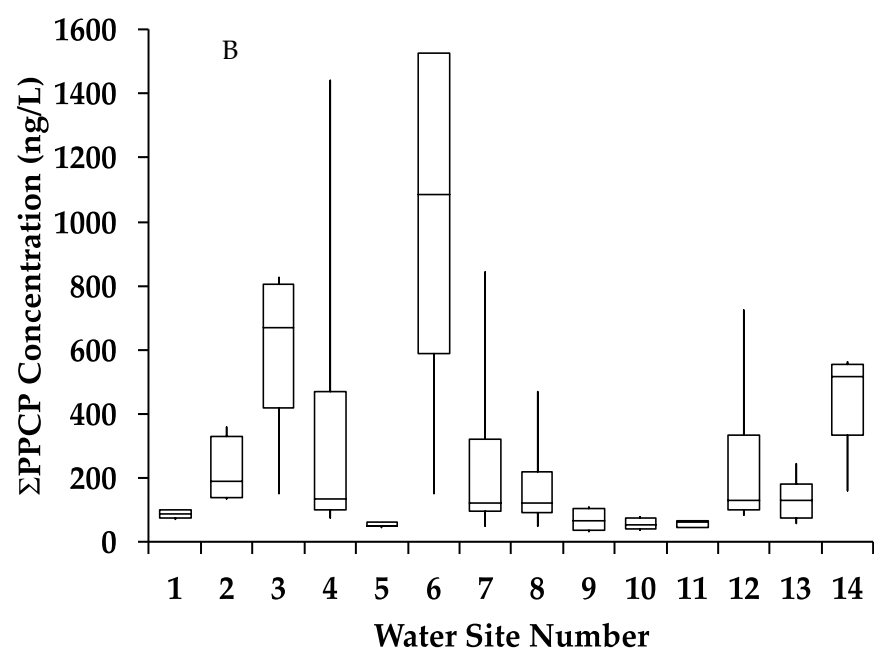

Figure S3. Box plots of  $\Sigma_{33w}$ PPCP concentrations in surface water for all PPCPs (A) and  $\Sigma_{31w}$ PPCPs minus caffeine and nicotine (B). (Boxes are 25<sup>th</sup> and 75<sup>th</sup> percentiles; lines are the medians; red circles are the flow-weighted averages; and whiskers are the 10<sup>th</sup> and 90<sup>th</sup> percentiles.).

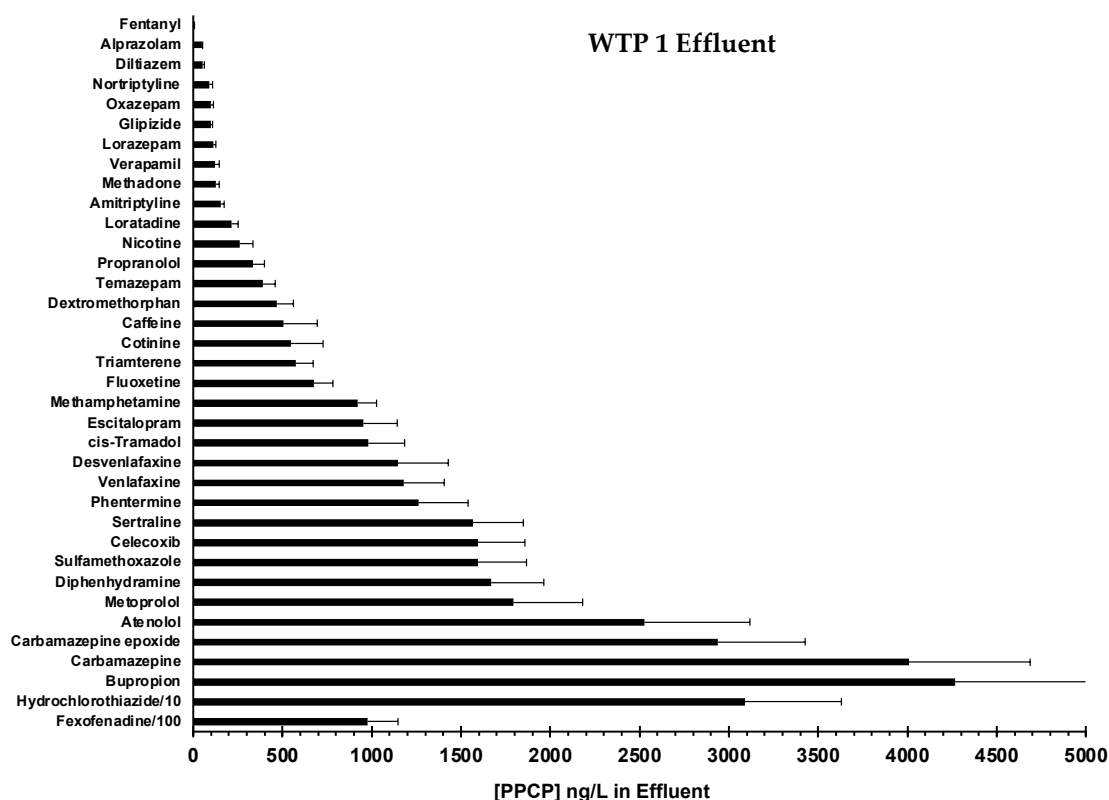

**Figure S4.** Mean concentrations of PPCPs in effluent from WTP 1 (N=3). Error bar is 1 SD of triplicate measurements.

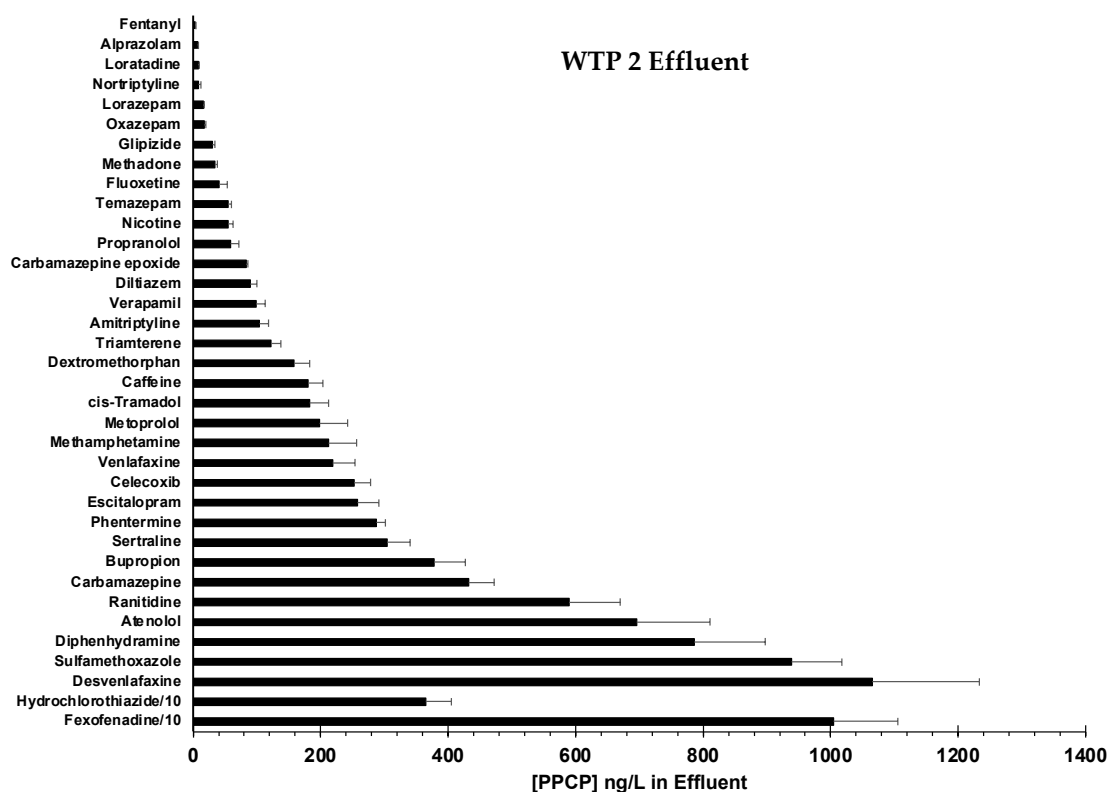

**Figure S5.** Mean concentrations of PPCPs in effluent from WTP 2 (N=3). Error bar is 1 SD of triplicate measurements.

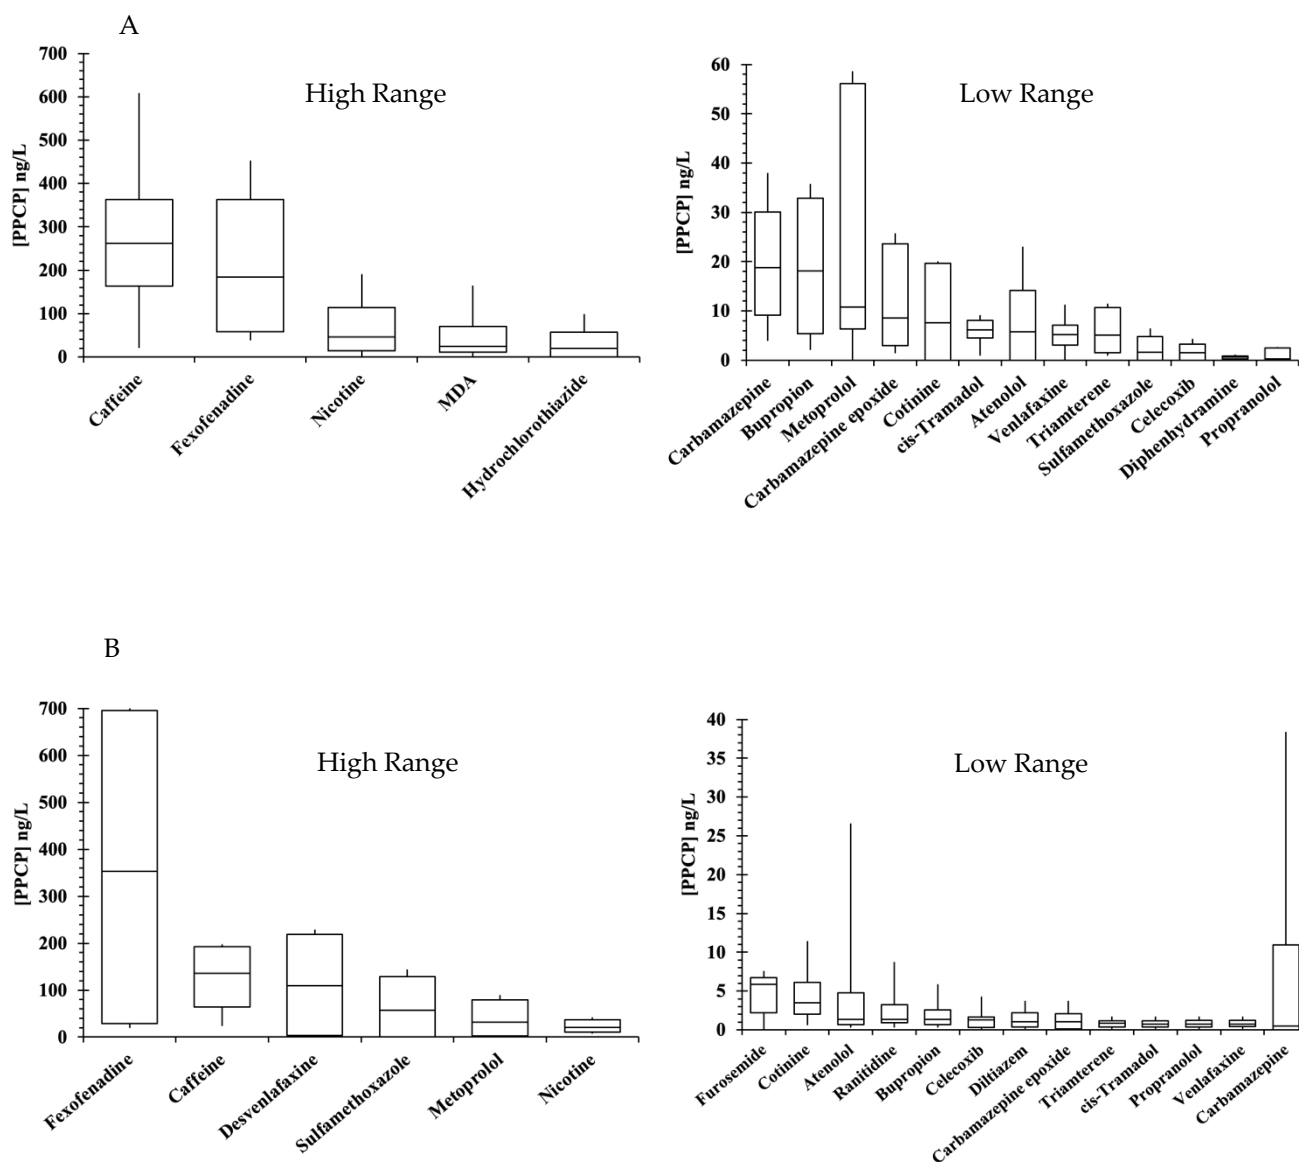

**Figure S6.** Box plot of individual PPCP concentrations at Four Mile Run (site 3) near WTP 1 (A) and individual PPCP concentrations at Upper Hunting Creek (site 6) near WTP 2 (B). (Boxes represent 25th and 75th percentiles and whiskers 5th and 95th percentiles.) PPCPs are separated into high range and low range concentrations.



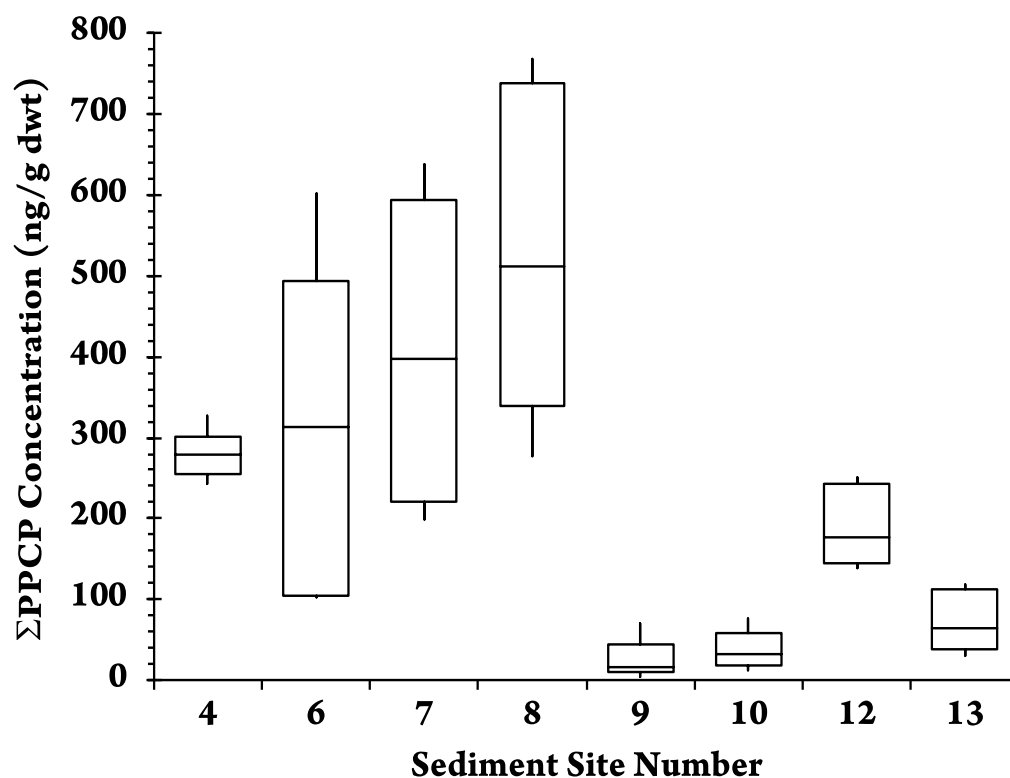

**Figure S7.** Box plot  $\Sigma_{39s}$ PPCP sediment samples in the tidal freshwater Potomac River. (Boxes are 25<sup>th</sup> and 75<sup>th</sup> percentiles; lines are the medians; and whiskers are the 10<sup>th</sup> and 90<sup>th</sup> percentiles.).

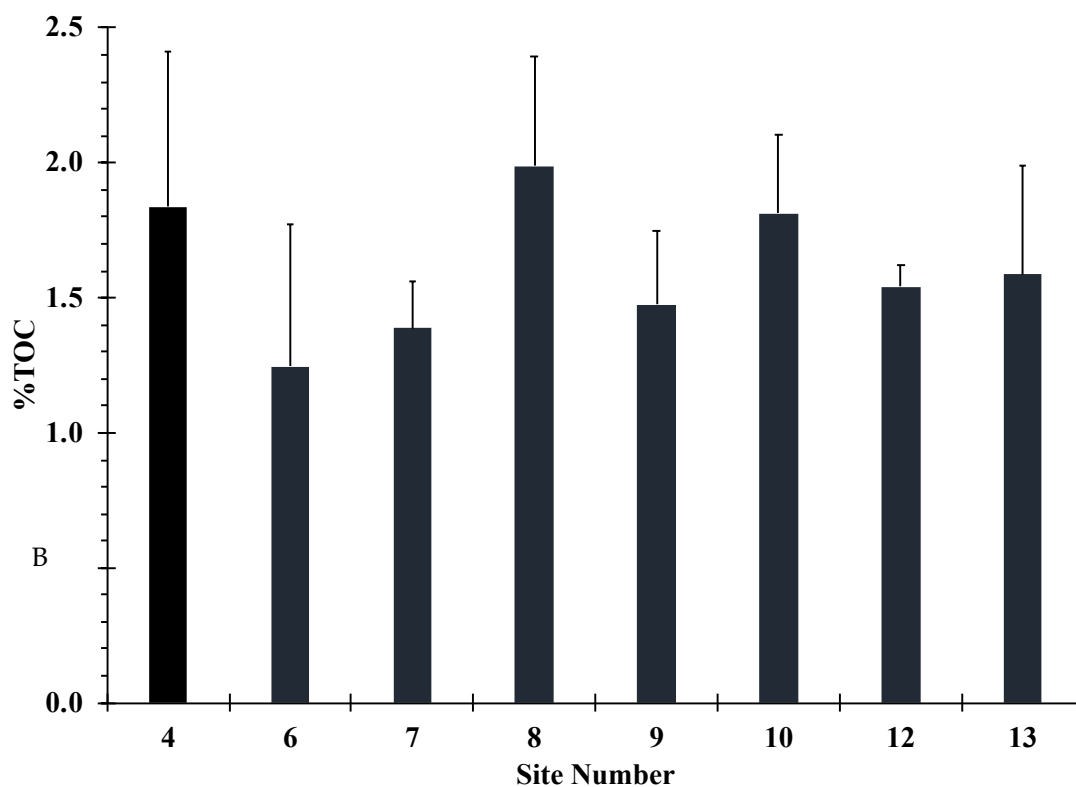

**Figure S8.** Sediment %total organic carbon (%TOC) content ( $\pm 1$  SD) at sites in the tidal freshwater Potomac River. Site numbers correspond to Figure 1.
